# Supplementary material for: Upper Critical Solution Temperature (UCST) Behavior of Coacervate of Cationic Protamine and Multivalent Anions
Source: Polymers (Basel). 2019 Apr 16;11(4):691. doi: 10.3390/polym11040691 (PMC6523134; doi:10.3390/polym11040691)
Supplement: Supplementary file 1 [file polymers-11-00691-s001.pdf]

# Supplementary Information

## Upper critical solution temperature (UCST) behavior of coacervate cationic protamine and anionic macroions

Hyungbin Kim<sup>1</sup>, Byoung-jin Jeon<sup>2</sup>, Sangsik Kim<sup>1,3</sup>, YongSeok Jho<sup>4,\*</sup> and Dong Soo Hwang<sup>1,3,\*</sup>

<sup>1</sup> Division of Integrative Biosciences and Biotechnology, Pohang University of Science and Technology (POSTECH), Pohang 37673, Republic of Korea ; hbkim22@postech.ac.kr

<sup>2</sup> Materials Department, University of California, Santa Barbara, Santa Barbara, CA 93106 USA ; saleh@ucsb.edu

<sup>3</sup> Division of Environmental Science and Engineering, Pohang University of Science and Technology (POSTECH), Pohang 37673, Republic of Korea ; ukssloveu@postech.ac.kr

<sup>4</sup> Department of Physics and Research Institute of Natural Science, Gyeongsang National University, Jinju 52828, Republic of Korea ; ysjho@gnu.ac.kr

\* Correspondence: yongseokjho@gmail.com or dshwang@postech.ac.kr; Tel.: +82-54-279-9505

Received: date; Accepted: date; Published: date

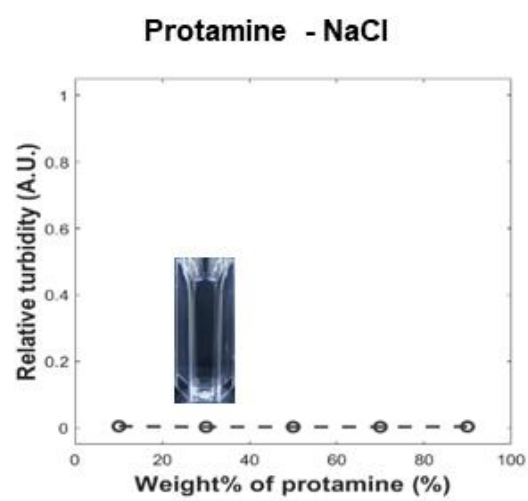

**Figure S1.** Turbidity of protamine/sodium chloride solution.

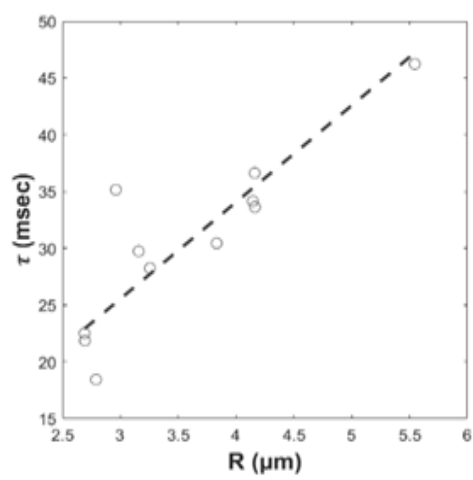

**Figure S2.** Measurement of  $\tau$  with variable radius of droplets for interfacial tension of the complex coacervate.

| FOV | R (um) | t(msec) |
|-----|--------|---------|
| 1   | 3.1570 | 29.74   |
| 2   | miss   | miss    |
| 3   | 2.6923 | 21.86   |
| 4   | 2.7886 | 18.43   |
| 5   | 2.9603 | 35.15   |
| 6   | 4.1624 | 33.63   |
| 7   | 2.6896 | 22.51   |
| 8   | 3.2550 | 28.24   |
| 9   | 3.8314 | 30.44   |
| 10  | 4.1602 | 36.63   |
| 11  | 5.5445 | 46.23   |
| 12  | 4.1438 | 34.15   |

**Table S1.** Measurement of  $\tau$  with variable radius of droplets for interfacial tension of the complex coacervate.
